# Supplementary material
Source: publisher figshare collection journal article supplement (https://acs.figshare.com/ndownloader/files/22616366)
Supplement: Supplementary file 1 [file 22616366]

# Supporting Information

## Understanding MXene Based “Symmetric” Supercapacitors and Redox Electrolyte Energy Storage

Yapeng Tian<sup>a</sup>, Chenhui Yang<sup>a</sup>, Yangyang Luo<sup>a</sup>, Hongyang Zhao<sup>b</sup>,

Yaping Du<sup>\*,b</sup>, Ling Bing Kong<sup>\*,c</sup>, and Wenxiu Que<sup>\*,a</sup>

<sup>a</sup> Electronic Materials Research Laboratory, International Center for Dielectric Research, Key Laboratory of the Ministry of Education, Shaanxi Engineering Research Center of Advanced Energy Materials and Devices, School of Electronic & Information Engineering, Xi'an Jiaotong University, Xi'an 710049, Shaanxi, People's Republic of China

<sup>b</sup> Frontier Institute of Science and Technology, Xi'an Jiaotong University, Xi'an 710049, Shaanxi, People's Republic of China

<sup>c</sup> College of New Materials and New Energies, Shenzhen Technology University, Shenzhen 518118, Guangdong, People's Republic of China

*\*Corresponding author:* Prof. W. Que, Prof. Y. Du and Prof. L. B. Kong

*E-mail address:* wxque@mail.xjtu.edu.cn (W. Que), ypdu2013@mail.xjtu.edu.cn (Y. Du) and konglingbing@sztu.edu.cn (L. B. Kong).

## List of content

### Calculation

**Testing of the working potentials of the negative and positive electrodes vs. Hg/Hg<sub>2</sub>SO<sub>4</sub> electrode.**

**Synthesis of Ti<sub>3</sub>AlC<sub>2</sub> powders.**

**Materials characterization.**

**Table S1** The working potential range of the positive and negative electrodes at different scan rates.

**Table S2.** The resistance for the cell in different electrolytes.

**Fig. S1.** Schematic diagram of preparation progress of the Ti<sub>3</sub>C<sub>2</sub>T<sub>x</sub> and flexible films.

**Fig. S2.** (a) The flake-size distribution of MXene nanosheets; (b) Cross-section image of the Ti<sub>3</sub>C<sub>2</sub>T<sub>x</sub> film and (c) the corresponding EDS elemental mappings of C and Ti.

**Fig. S3.** (a-b) SEM images of the Ti<sub>3</sub>AlC<sub>2</sub> nanosheets at different magnifications.

**Fig. S4.** (a) XPS survey spectrum of the Ti<sub>3</sub>C<sub>2</sub>T<sub>x</sub> film. (b) Ti 2p XPS spectra of the Ti<sub>3</sub>C<sub>2</sub>T<sub>x</sub> film. (c) XPS survey spectrum of the Ti<sub>3</sub>C<sub>2</sub>T<sub>x</sub> film after activation. (d) Ti 2p XPS spectra of the Ti<sub>3</sub>C<sub>2</sub>T<sub>x</sub> film after activation.

**Fig. S5** GCD curves of the Ti<sub>3</sub>C<sub>2</sub>T<sub>x</sub> film based SCs in 3 M H<sub>2</sub>SO<sub>4</sub> electrolyte.

**Fig. S6.** (a) Device to measure the working potential range of the positive and negative electrodes, (b) Swagelok equipment used to measure the progress characteristics and the schematic diagram of the Swagelok equipment.

**Fig. S7 (a) Standard two-electrode system :** The system only can obtain the overall performance of supercapacitors; **(b) Improved two-electrode system:** in this system, the reference electrode is introduced to set up a third circuit to monitor the potential variation of each electrode in the actual working process of supercapacitors; **(c) Three-electrode system:** this method can be used to

investigate the real capacitance behavior of electrode materials in the positive and negative potential range, thus avoiding the interaction between the positive and negative electrodes.

**Fig. S8** CV curves of the  $\text{Ti}_3\text{C}_2\text{T}_x$  based symmetric SC for the first 3 cycles at different scan rates: (a)  $5 \text{ mV s}^{-1}$ , (c)  $10 \text{ mV s}^{-1}$ , (e)  $20 \text{ mV s}^{-1}$  and (g)  $50 \text{ mV s}^{-1}$ . CV curves of the  $\text{Ti}_3\text{C}_2\text{T}_x$  based symmetric SC after activation at different scan rates: (b)  $5 \text{ mV s}^{-1}$ , (d)  $10 \text{ mV s}^{-1}$ , (f)  $20 \text{ mV s}^{-1}$ , and (h)  $50 \text{ mV s}^{-1}$ .

**Fig. S9** The blue area is the available potential for  $\text{Ti}_3\text{C}_2$  MXene in 3 M  $\text{H}_2\text{SO}_4$  electrolyte; N and P represent the potential of the positive and negative electrodes, respectively.

**Fig. S10** (a) Parameters:  $P_N$  and  $P_P$  represent the potential of the negative and positive electrodes, respectively.  $P_{0V}$  represents the potential of both electrodes when the SCs are operated at 0 V. (b) Illustration of  $P_{0V}$  shifting to a lower potential with electrochemical surface modification.

**Fig. S11.** (a) CV curves of the positive electrode at the scan rates of 2, 5, 10, 20 and  $50 \text{ mV s}^{-1}$ . (b) GCD curves of the positive electrode at different current densities. (c) CV curves of the negative electrode at the scan rates of 2, 5, 10, 20 and  $50 \text{ mV s}^{-1}$ . (d) GCD curves of the negative electrode at different current densities. All the data were tested under the condition of three-electrode system.

**Fig. S12.** In situ XRD patterns for the negative electrode (a) and positive electrode in the mixed electrolyte (b), the negative electrode (c) and the positive electrode (d) in the  $\text{H}_2\text{SO}_4$  electrolyte. (e) The XRD patterns for the positive electrode for the sample of the activated electrode (after 30 cyclings) and the sample after 5000 cycles in the mixed electrolyte.

**Fig. S13** (a) GCD curves for the cell in the mixed electrolyte at different current densities. (b) Gravimetric capacitance and volumetric capacitance of the cell in the mixed electrolyte calculated from the GCD curves. (c) GCD curves of the MXene

electrode in the mixed electrolyte at different current densities in the form of three-electrode system. (d) Gravimetric capacitance and volumetric capacitance of the MXene electrode in the mixed electrolyte in the form of three-electrode system calculated from the GCD curves.

**Fig. S14** CV curves for the MXene electrode in 3 M H<sub>2</sub>SO<sub>4</sub> + 0.2 M KI (a) and 1 M H<sub>2</sub>SO<sub>4</sub> + 0.2 M KI (b) in the form of three-electrode system. (c) Volumetric capacitance of the electrode in different electrolytes at different scan rates calculated from the CV data. CV curves of the MXene based cells in 3 M H<sub>2</sub>SO<sub>4</sub> + 0.2 M KI (d) and 1 M H<sub>2</sub>SO<sub>4</sub> + 0.2 M KI (e) electrolytes. (f) Volumetric capacitance of the cell in different electrolytes at different scan rates calculated from the CV data. (g) Volumetric energy density of the cell in different electrolytes at different scan rates.

**Fig. S15.** CV curves of the MXene electrode with different real mass loading in 3 M H<sub>2</sub>SO<sub>4</sub> + 0.2 M KI electrolyte under three-electrode system at the scan rates of 2, 5, 10, 20, and 50 mV s<sup>-1</sup>: (a) 1.8, (b) 1.6 and (c) 1.2 mg cm<sup>-2</sup>. (d) Volumetric capacitance of the MXene electrode with different real mass loadings at different scan rates.

**Fig. S16.** GCD curves of the Ti<sub>3</sub>C<sub>2</sub>T<sub>x</sub> film based SCs in 3 M H<sub>2</sub>SO<sub>4</sub> (a) and 3 M H<sub>2</sub>SO<sub>4</sub> + 0.2 M KI electrolytes (b). GCD curves of the Ti<sub>3</sub>C<sub>2</sub>T<sub>x</sub> film based SCs in 3 M H<sub>2</sub>SO<sub>4</sub> and 3 M H<sub>2</sub>SO<sub>4</sub> + 0.2 M KI electrolytes based on the total mass of the two electrodes at different current densities: (c) 1 A g<sup>-1</sup>, (d) 5 A g<sup>-1</sup> and (e) 50 A g<sup>-1</sup>.

**Fig. S17.** (a) Nyquist plots of the Ti<sub>3</sub>C<sub>2</sub>T<sub>x</sub> film based cells in 3 M H<sub>2</sub>SO<sub>4</sub> and 3 M H<sub>2</sub>SO<sub>4</sub> + 0.2 M KI electrolytes and its electrical equivalent circuit. (b) Magnified high-frequency region of the Nyquist plots.

### Calculation.

Gravimetric capacitance,  $C_g$  (F g<sup>-1</sup>), of the working electrode can be calculated from the CV curves by using the following equation:

$$C_g = \int I dV / (2 m s \Delta V), \quad (S1)$$

where  $I$  (A) is the response current of the CV curve,  $s$  (V s<sup>-1</sup>) is the scan rate,  $\Delta V$  (V) is the potential window and  $m$  (g) is the mass loaded in working electrode.

Volumetric capacitance,  $C_v$  (F cm<sup>-3</sup>), of the working electrode can be also calculated from the CV curves by using the following equation:

$$C_v = \int I dV / (2 V s \Delta V), \quad (S2)$$

where  $V$  (cm<sup>3</sup>) is the volume of the film in working electrode.

Gravimetric capacitance,  $C_{g,cell}$  (F g<sup>-1</sup>), of the symmetric supercapacitors can be calculated from the CV curves by using the following equation:

$$C_{g,cell} = \int I dV / (2 m s \Delta V), \quad (S3)$$

where  $I$  (A) is the response current of the CV curves,  $s$  (V s<sup>-1</sup>) is the scan rate,  $\Delta V$  (V) is the potential window and  $m$  (g) is the total mass loaded in two electrodes.

Volumetric capacitance,  $C_{v,cell}$  (F cm<sup>-3</sup>), of the symmetric supercapacitors can be calculated from the CV curves by using the following equation:

$$C_{v,cell} = \int I dV / (2 V s \Delta V), \quad (S4)$$

where  $V$  (cm<sup>3</sup>) is the total volume of the films in two electrodes.

Energy density,  $E$  (Wh L<sup>-1</sup> or Wh kg<sup>-1</sup>), and power density,  $P$  (W L<sup>-1</sup> or W kg<sup>-1</sup>), of the symmetric supercapacitors can be calculated according to the following equations:

$$E_g = \int V(t) I dt / M \quad (S5)$$

$$E_v = \int V(t) I dt / V \quad (S6)$$

$$P = 3600 E / \Delta t, \quad (S7)$$

where  $V(t)$  (V) is the discharge voltage excluding the IR drop,  $i$  is the current (A),  $M$  and  $V$  are total mass and volume of the active materials (cathode and anode), respectively.

### **Testing of the working potentials of the negative and positive electrodes vs. Hg/Hg<sub>2</sub>SO<sub>4</sub> electrode**

The working voltage ranges of the negative electrode were measured with the two-electrode configuration in 3 M H<sub>2</sub>SO<sub>4</sub> at room temperature. A multimeter was connected to the negative electrode and the reference electrode (Hg/Hg<sub>2</sub>SO<sub>4</sub> electrode) to measure the potential of the negative electrode vs. the reference electrode, when the cyclic voltammetry was tested at different scan rates. Therefore, the potential of the positive electrode vs. the reference electrode can be obtained with the voltage between the positive electrode and the negative electrode is 1 V.

## **Materials**

Unless otherwise indicated, all the chemicals (analytical grade) were from Shanghai Aladdin Biochemical Polytron Technologies Inc, China.

### **Synthesis of $\text{Ti}_3\text{AlC}_2$ powders**

Firstly, the mixed powders of TiC (2-4  $\mu\text{m}$ , 99%, Aladdin), Al (1-3  $\mu\text{m}$ , 99.5%, Aladdin) and Ti ( $\leq 48$   $\mu\text{m}$ , 99.99%, Aladdin), with a molar ratio of 2:1.2:1, were ball-milled in absolute ethyl alcohol for 4 h at a speed of 350 rpm. Then, the mixture was sintered at 1400  $^{\circ}\text{C}$  for 2 h in Ar atmosphere. Finally, the sintered product was further ground to obtain fine powders, which were then sieved through a 400 mesh screen.

### **Materials characterization**

Microstructure and elemental composition of the samples were characterized by using field-emission scanning electron microscopy (FE-SEM, Hitachi S-4800), equipped with energy-dispersive X-ray analysis (EDAX) (Hiroba). The morphological properties of the samples were observed by using transmission electron microscopy (TEM, FEI company Tecnai G220 S-twin, 200 kV). X-ray diffraction (XRD) patterns of the samples were recorded by using a Rigaku D/max 2200pc diffractometer, with Cu  $K\alpha$  radiation of wavelength  $\lambda = 0.15418$  nm, at 40 kV and 40 mA. X-ray photoelectron spectroscopy (XPS) measurements of the samples were fulfilled by utilizing a Thermo Fisher ESCALAB Xi<sup>+</sup> with an exciting source of Al  $K\alpha$ .

**Table S1** Working potential ranges for the positive and negative electrodes at different scan rates.

| Scan rate<br>(mV s <sup>-1</sup> ) | Potential range for<br>the positive<br>electrode<br>(V vs. Hg/Hg <sub>2</sub> SO <sub>4</sub> ) | Absolute<br>potential for<br>the positive<br>electrode (V) | Potential range for<br>the negative<br>electrode<br>(V vs. Hg/Hg <sub>2</sub> SO <sub>4</sub> ) | Absolute<br>potential for<br>the negative<br>electrode (V) |
|------------------------------------|-------------------------------------------------------------------------------------------------|------------------------------------------------------------|-------------------------------------------------------------------------------------------------|------------------------------------------------------------|
| 2                                  | -0.702 ~ -0.108                                                                                 | 0.594                                                      | -1.108 ~ -0.702                                                                                 | 0.406                                                      |
| 5                                  | -0.715 ~ -0.105                                                                                 | 0.61                                                       | -1.105 ~ -0.715                                                                                 | 0.39                                                       |
| 10                                 | -0.720 ~ -0.100                                                                                 | 0.62                                                       | -1.100 ~ -0.100                                                                                 | 0.38                                                       |
| 20                                 | -0.720 ~ -0.080                                                                                 | 0.64                                                       | -1.080 ~ -0.720                                                                                 | 0.36                                                       |
| 50                                 | -0.720 ~ -0.070                                                                                 | 0.65                                                       | -1.070 ~ -0.720                                                                                 | 0.35                                                       |

As shown in Table S1, the working potential ranges for the positive and negative electrodes show a unsteady from 2 to 50 mV s<sup>-1</sup>, which were derived from the modified two-electrode systems in the H<sub>2</sub>SO<sub>4</sub> electrolyte. As a result, this observation is not contradictory to the conclusion that the specific capacitance of the negative electrode is much higher than that of the positive electrode in the MXene based symmetric SCs. Therefore, the specific capacitances at 2, 5, 10, 20 and 50 mV s<sup>-1</sup> of the negative electrode are not in full agreement with the expected values, as those presented in Fig. 2f of the manuscript.



**Table S2.** The resistance for the cell in different electrolytes.

| Resistance<br>Electrolyte                     | Rs ( $\Omega \text{ cm}^2$ ) | Rct ( $\Omega \text{ cm}^2$ ) |
|-----------------------------------------------|------------------------------|-------------------------------|
| 3 M H <sub>2</sub> SO <sub>4</sub>            | 0.50                         | 1.0                           |
| 3 M H <sub>2</sub> SO <sub>4</sub> + 0.2 M KI | 0.52                         | 1.6                           |

**Fig. S1**

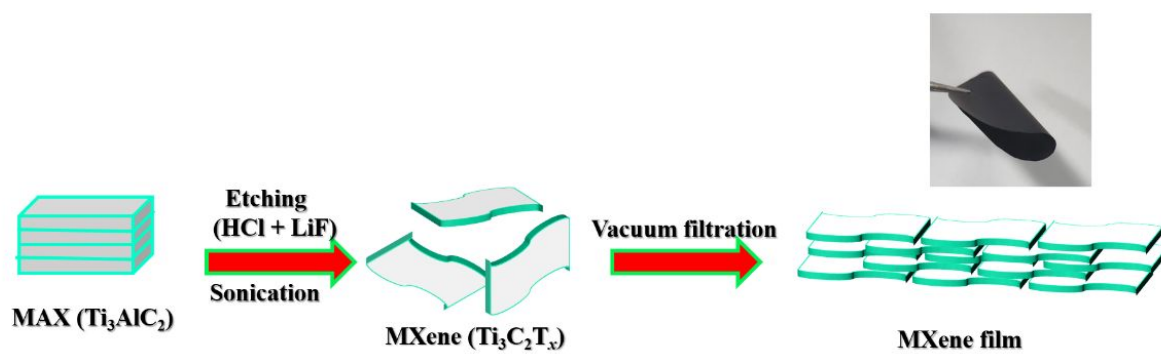

**Fig. S1.** Schematic diagram of preparation progress of the  $\text{Ti}_3\text{C}_2\text{T}_x$  and flexible films.

**Fig. S2**

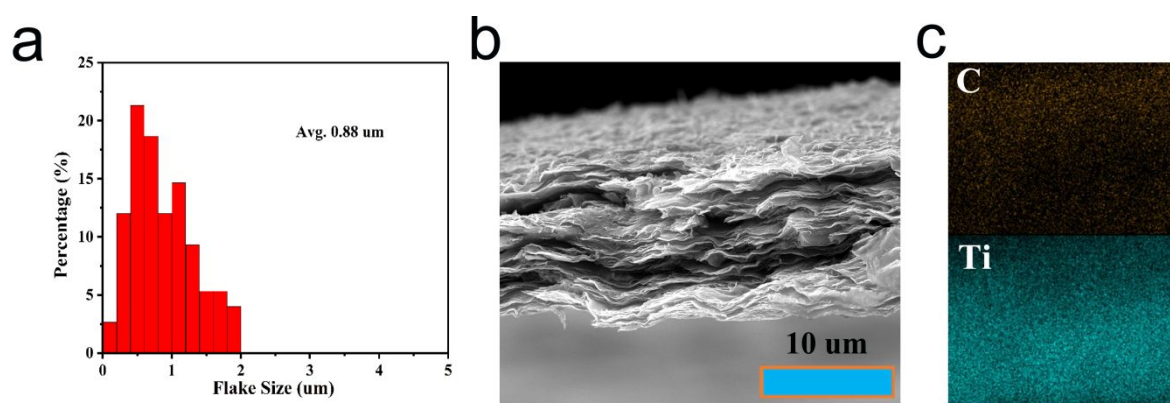

**Fig. S2.** (a) The flake-size distribution of MXene nanosheets; (b) Cross-section image of the  $\text{Ti}_3\text{C}_2\text{T}_x$  film and (c) the corresponding EDS elemental mappings of C and Ti.

**Fig. S3**

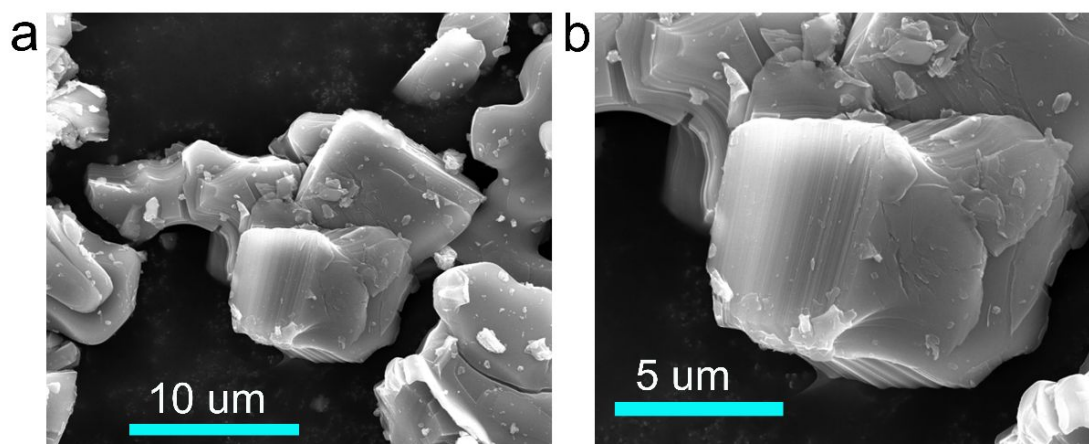

**Fig. S3.** (a-b) SEM images of the  $\text{Ti}_3\text{AlC}_2$  nanosheets at different magnifications.

Fig. S4

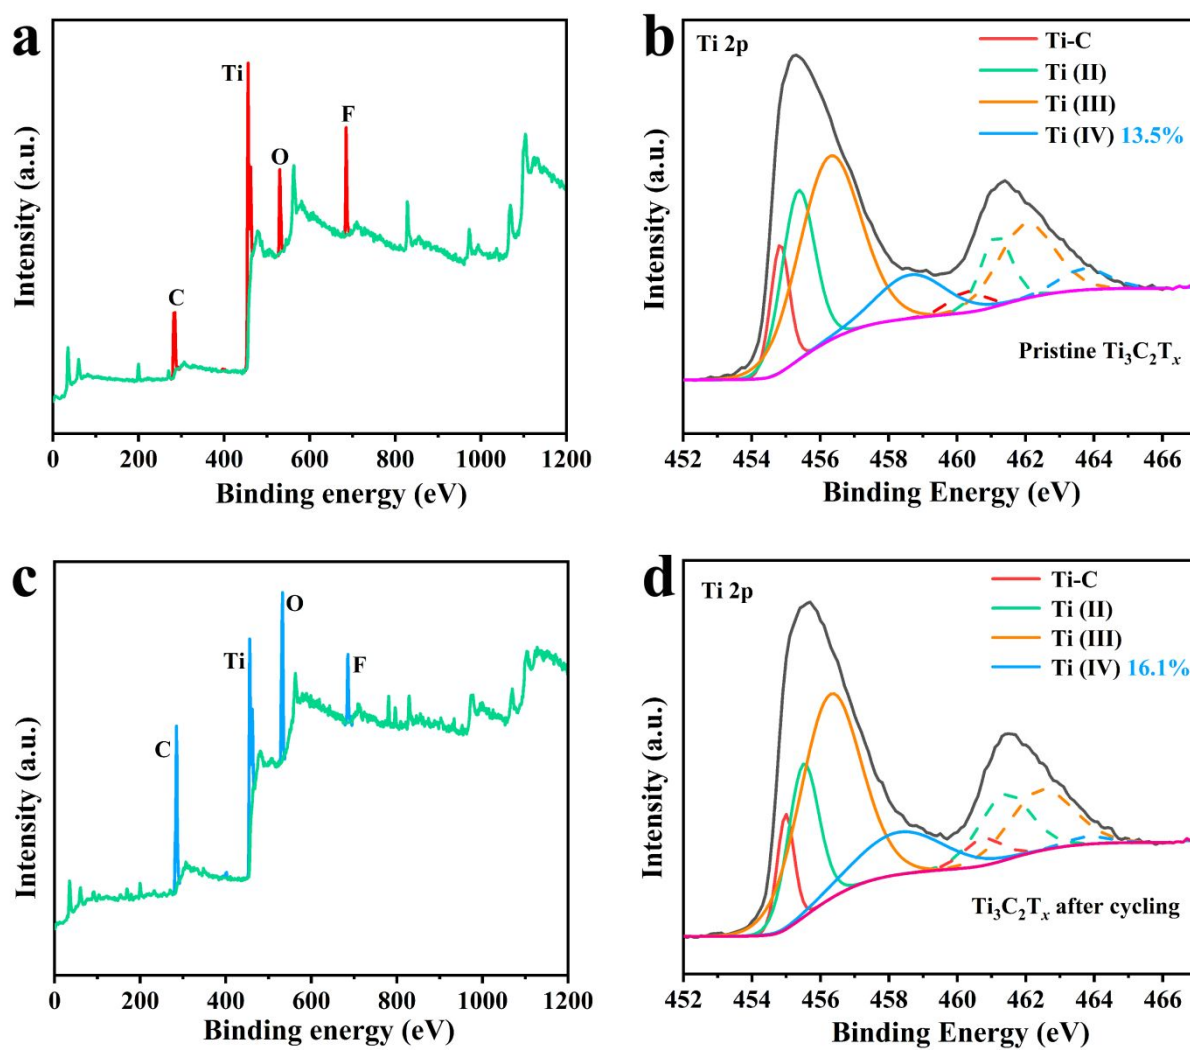

**Fig. S4.** (a) XPS survey spectrum of the  $\text{Ti}_3\text{C}_2\text{T}_x$  film. (b) Ti 2p XPS spectra of the  $\text{Ti}_3\text{C}_2\text{T}_x$  film. (c) XPS survey spectrum of the  $\text{Ti}_3\text{C}_2\text{T}_x$  film after activation. (d) Ti 2p XPS spectra of the  $\text{Ti}_3\text{C}_2\text{T}_x$  film after activation.

**Fig. S5**

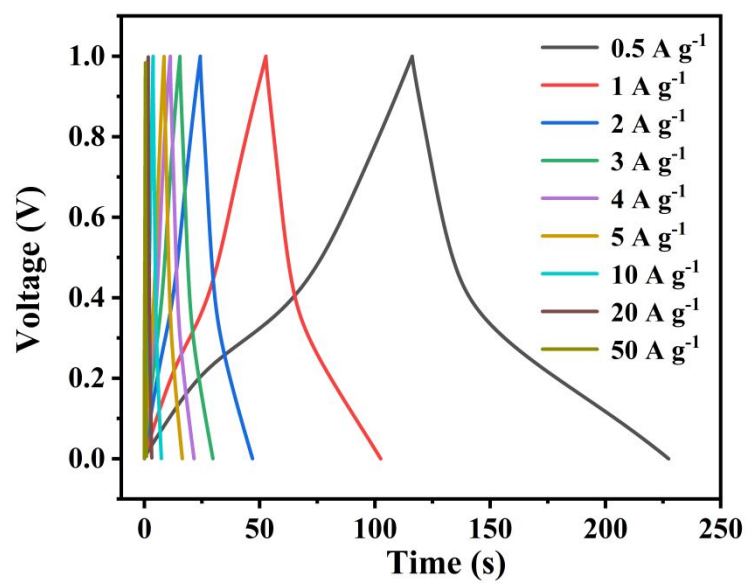

**Fig. S5** GCD curves of the  $\text{Ti}_3\text{C}_2\text{T}_x$  film based SCs in 3 M  $\text{H}_2\text{SO}_4$  electrolyte.

**Fig. S6**

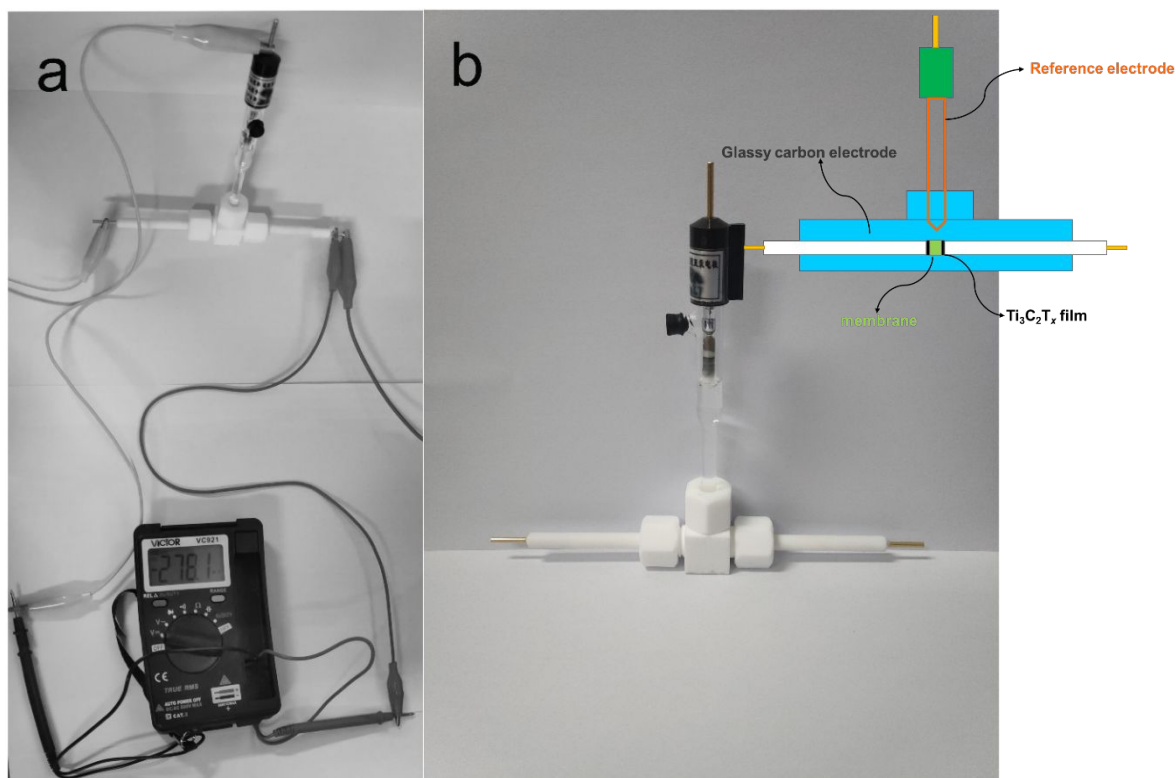

**Fig. S6.** (a) Device to measure the working potential range of the positive and negative electrodes, (b) Swagelok equipment used to measure the progress characteristics and the schematic diagram of the Swagelok equipment.

Fig. S7

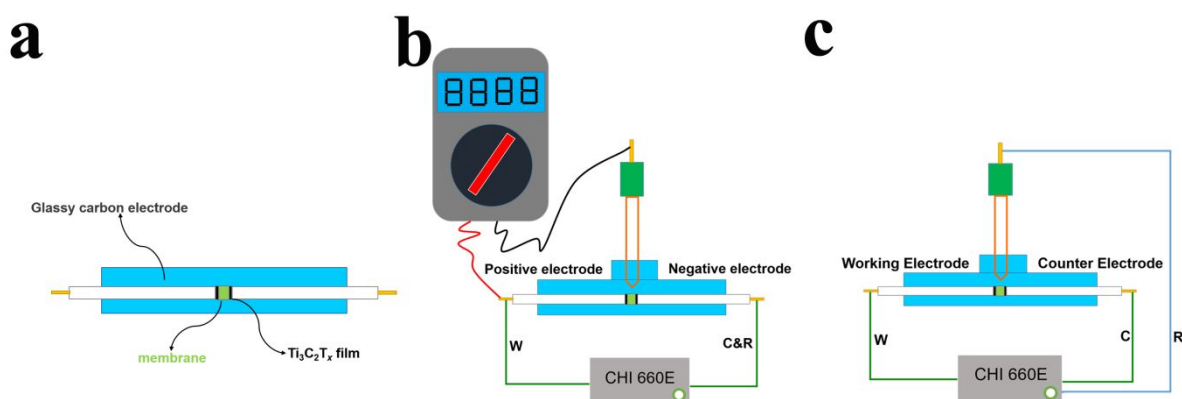

**Fig. S7 (a) Standard two-electrode system :** The system only can obtain the overall performance of supercapacitors; **(b) Improved two-electrode system:** in this system, the reference electrode is introduced to set up a third circuit to monitor the potential variation of each electrode in the actual working process of supercapacitors; **(c) Three-electrode system:** this method can be used to investigate the real capacitance behavior of electrode materials in the positive and negative potential range, thus avoiding the interaction between the positive and negative electrodes.



**Fig. S8**

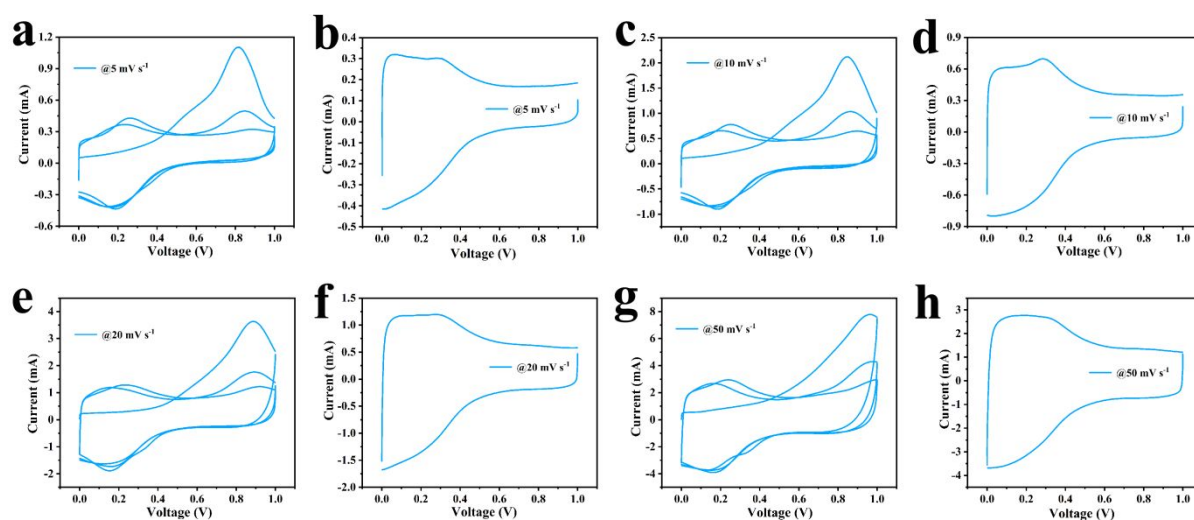

**Fig. S8** CV curves of the  $\text{Ti}_3\text{C}_2\text{T}_x$  based symmetric SC for the first 3 cycles at different scan rates: (a)  $5 \text{ mV s}^{-1}$ , (c)  $10 \text{ mV s}^{-1}$ , (e)  $20 \text{ mV s}^{-1}$  and (g)  $50 \text{ mV s}^{-1}$ . CV curves of the  $\text{Ti}_3\text{C}_2\text{T}_x$  based symmetric SC after activation at different scan rates: (b)  $5 \text{ mV s}^{-1}$ , (d)  $10 \text{ mV s}^{-1}$ , (f)  $20 \text{ mV s}^{-1}$ , and (h)  $50 \text{ mV s}^{-1}$ .

**Fig. S9**

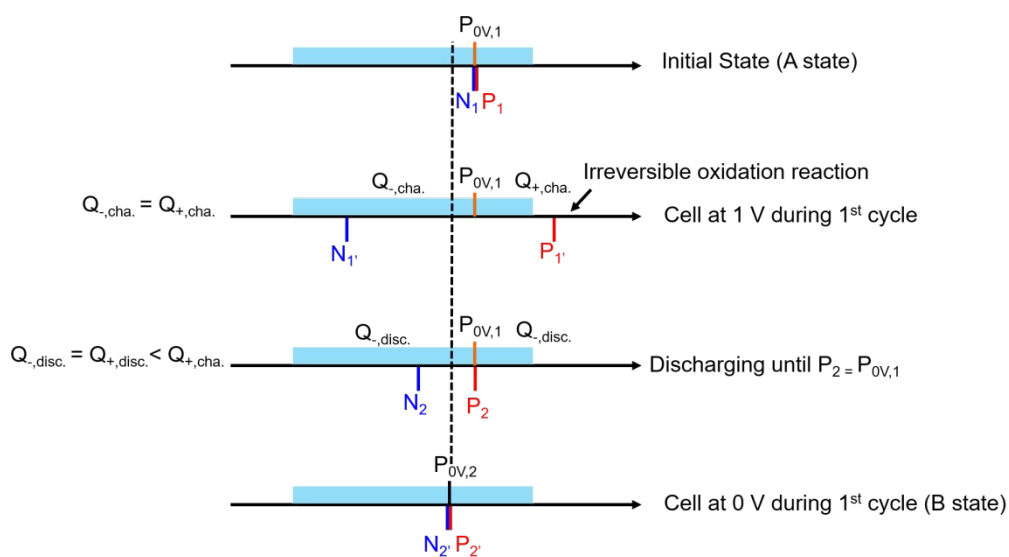

**Fig. S9** The blue area is the available potential for  $\text{Ti}_3\text{C}_2$  MXene in 3 M  $\text{H}_2\text{SO}_4$  electrolyte; N and P represent the potential of the positive and negative electrodes, respectively.

**Fig. S10**

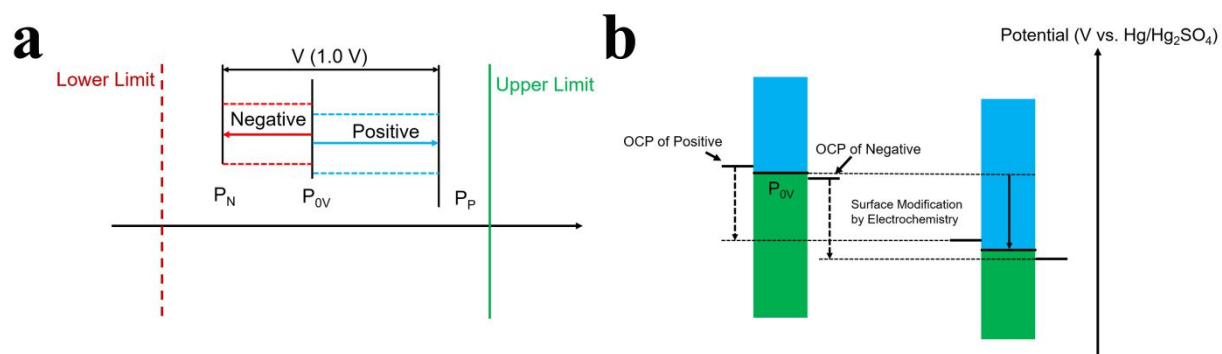

**Fig. S10 (a) Parameters:**  $P_N$  and  $P_P$  represent the potential of the negative and positive electrodes, respectively.  $P_{0V}$  represents the potential of both electrodes when the SCs are operated at 0 V. **(b)** Illustration of  $P_{0V}$  shifting to a lower potential with electrochemical surface modification.

Fig. S11

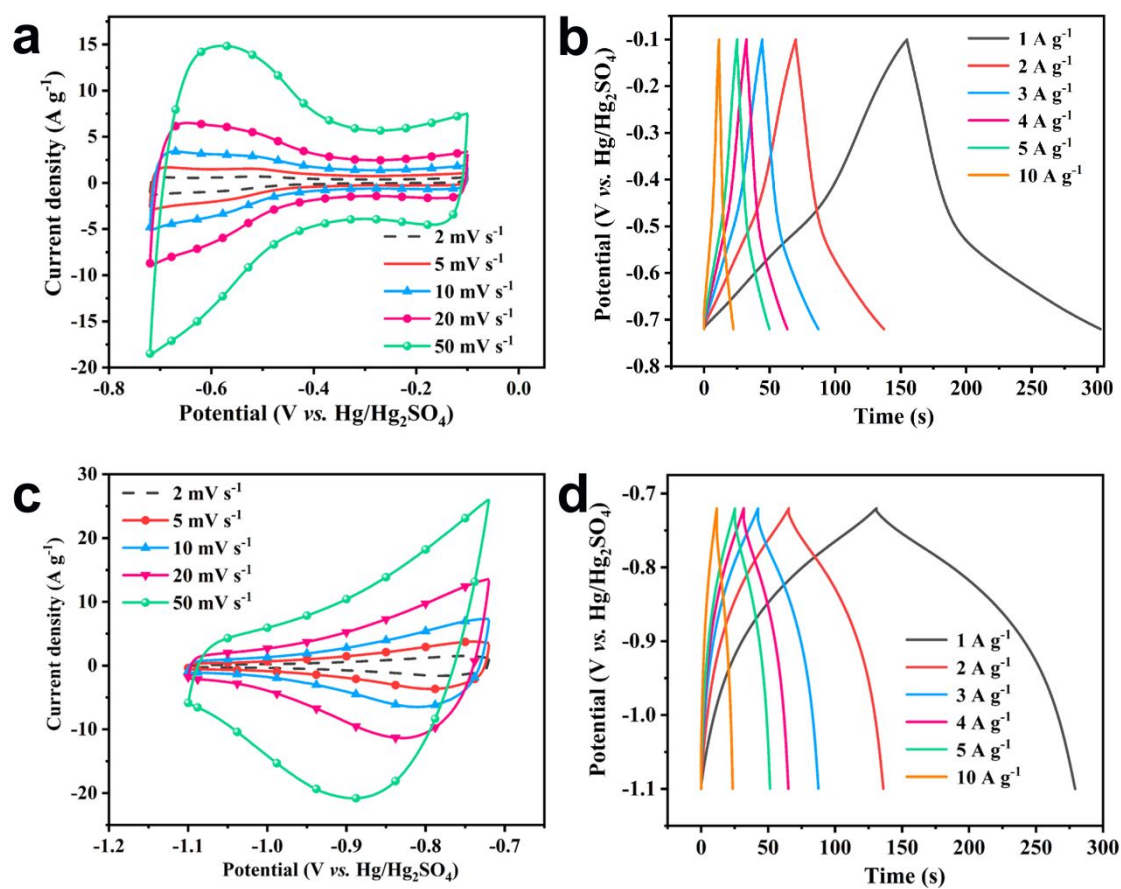

**Fig. S11.** (a) CV curves of the positive electrode at the scan rates of 2, 5, 10, 20 and 50  $\text{mV s}^{-1}$ . (b) GCD curves of the positive electrode at different current densities. (c) CV curves of the negative electrode at the scan rates of 2, 5, 10, 20 and 50  $\text{mV s}^{-1}$ . (d) GCD curves of the negative electrode at different current densities. All the data were tested under the condition of three-electrode system.

**Fig. S12**

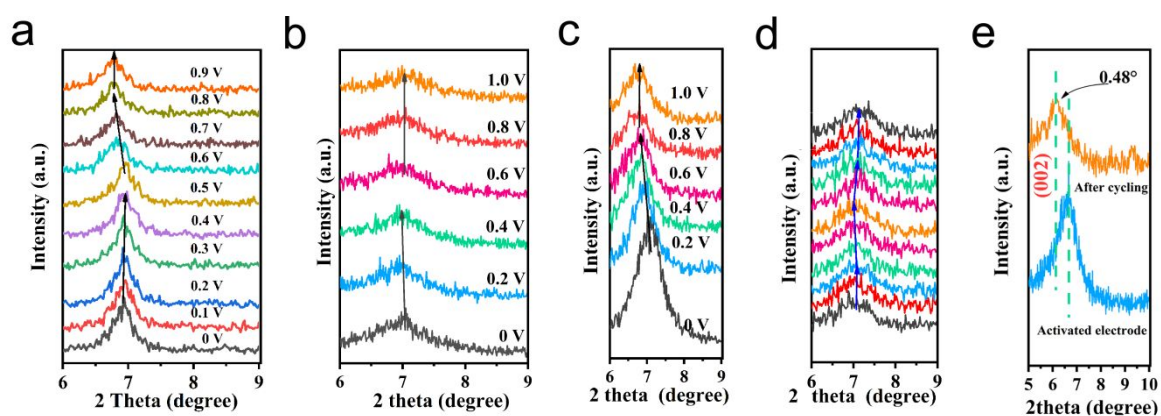

**Fig. S12.** In situ XRD patterns for the negative electrode (a) and positive electrode in the mixed electrolyte (b), the negative electrode (c) and the positive electrode (d) in the H<sub>2</sub>SO<sub>4</sub> electrolyte. (e) The XRD patterns for the positive electrode for the sample of the activated electrode (after 30 cyclings) and the sample after 5000 cycles in the mixed electrolyte.

Fig. S13

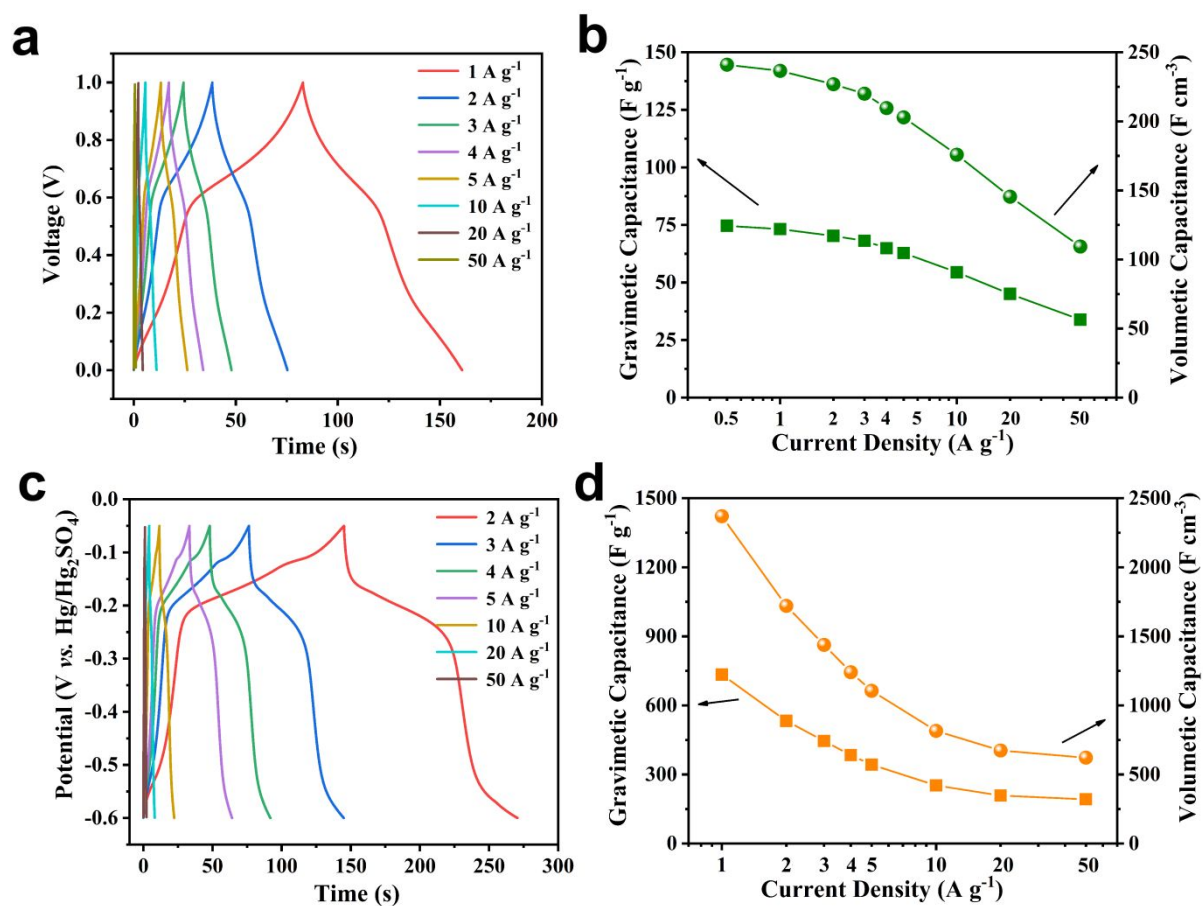

**Fig. S13** (a) GCD curves for the cell in the mixed electrolyte at different current densities. (b)

Gravimetric capacitance and volumetric capacitance of the cell in the mixed electrolyte calculated from the GCD curves. (c) GCD curves of the MXene electrode in the mixed electrolyte at different current densities in the form of three-electrode system. (d) Gravimetric capacitance and volumetric capacitance of the MXene electrode in the mixed electrolyte in the form of three-electrode system calculated from the GCD curves.

Fig. S14

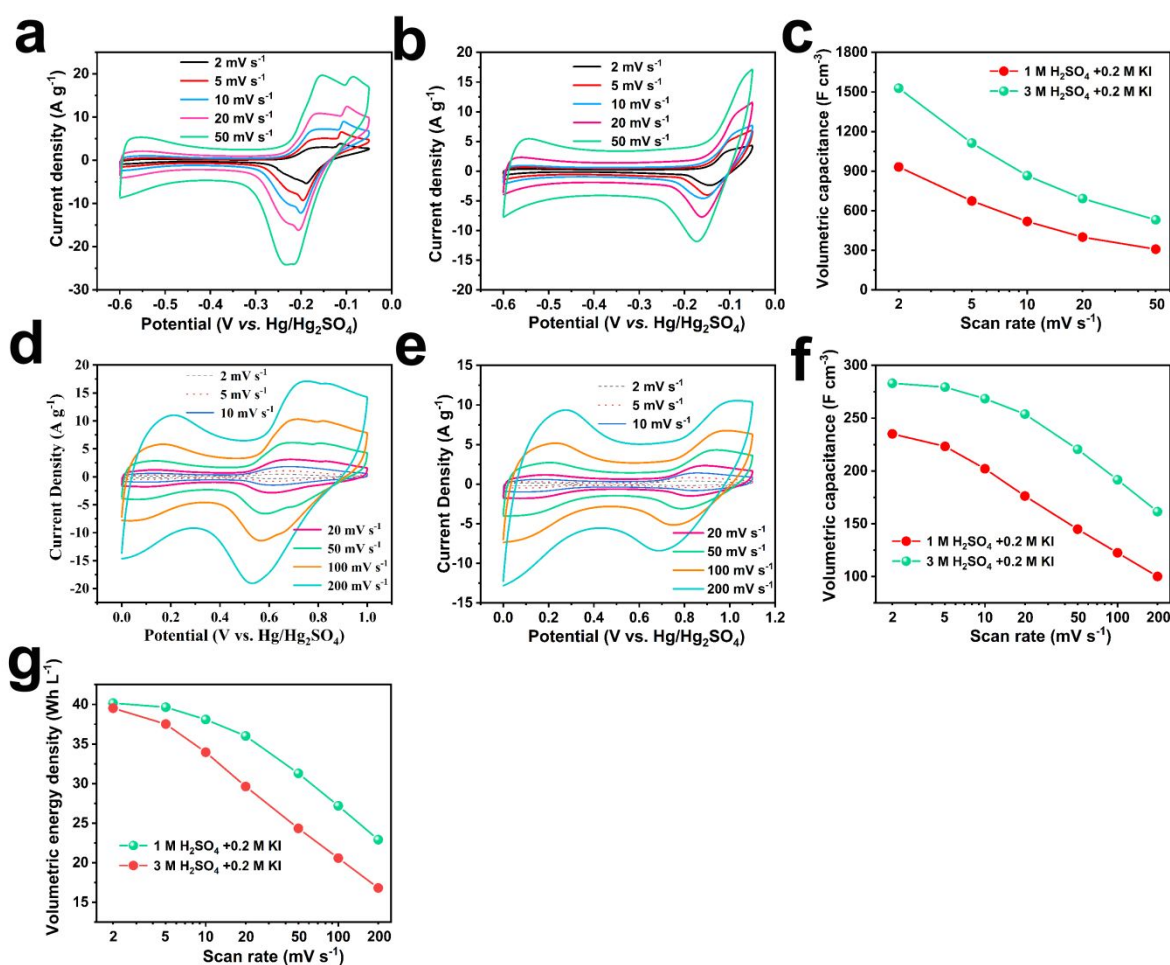

**Fig. S14** CV curves for the MXene electrode in 3 M H<sub>2</sub>SO<sub>4</sub> + 0.2 M KI (a) and 1 M H<sub>2</sub>SO<sub>4</sub> + 0.2 M KI (b) in the form of three-electrode system. (c) Volumetric capacitance of the electrode in different electrolytes at different scan rates calculated from the CV data. CV curves of the MXene based cells in 3 M H<sub>2</sub>SO<sub>4</sub> + 0.2 M KI (d) and 1 M H<sub>2</sub>SO<sub>4</sub> + 0.2 M KI (e) electrolytes. (f) Volumetric capacitance of the cell in different electrolytes at different scan rates calculated from the CV data. (g) Volumetric energy density of the cell in different electrolytes at different scan rates.

Fig. S15

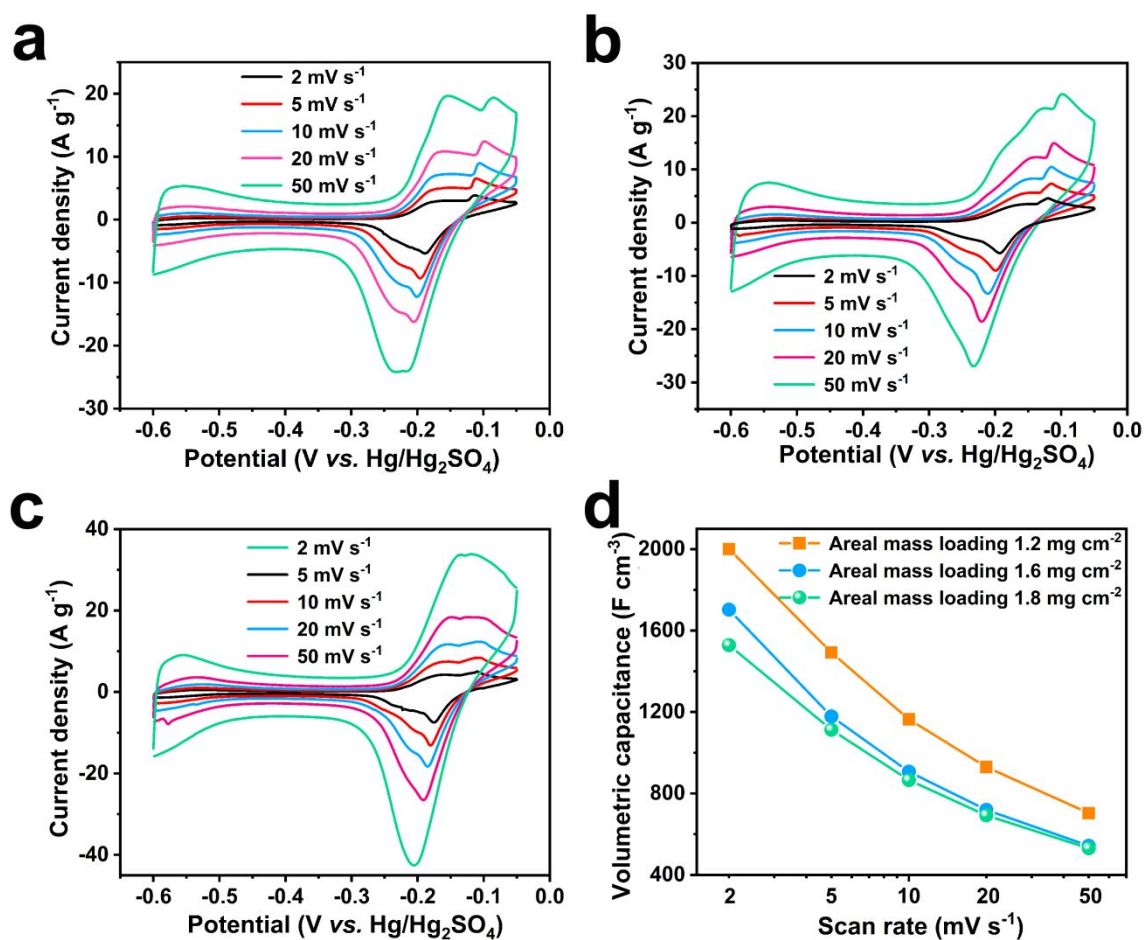

**Fig. S15.** CV curves of the MXene electrode with different real mass loading in 3 M  $\text{H}_2\text{SO}_4$  + 0.2 M KI electrolyte under three-electrode system at the scan rates of 2, 5, 10, 20, and 50  $\text{mV s}^{-1}$ : (a) 1.8, (b) 1.6 and (c) 1.2  $\text{mg cm}^{-2}$ . (d) Volumetric capacitance of the MXene electrode with different real mass loadings at different scan rates.



**Fig. S16**

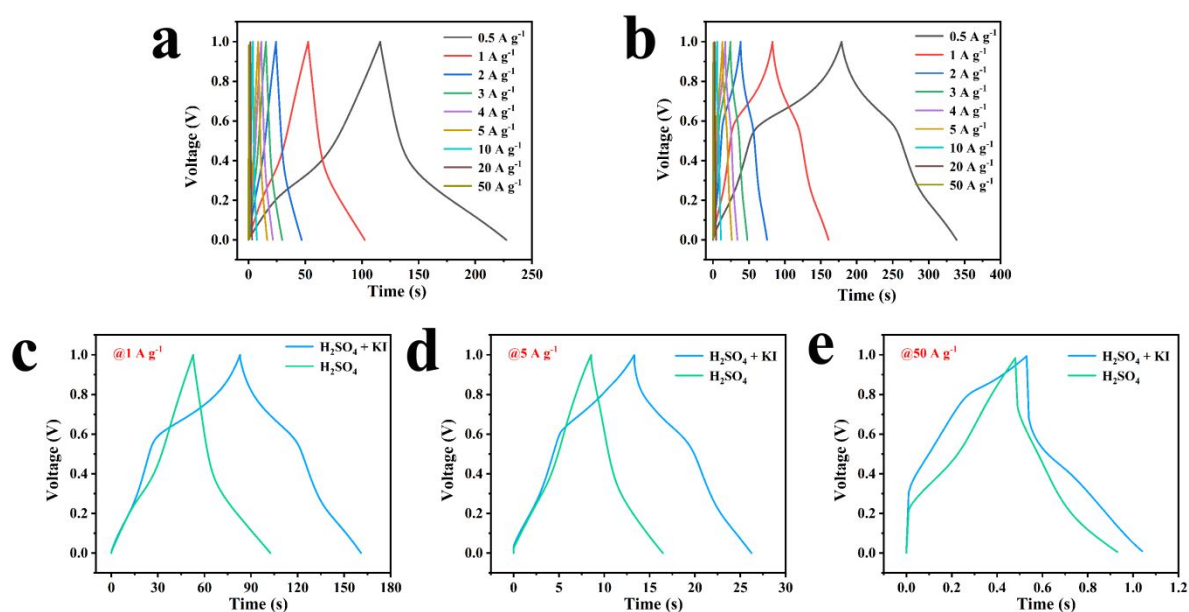

**Fig. S16.** GCD curves of the  $\text{Ti}_3\text{C}_2\text{T}_x$  film based SCs in 3 M  $\text{H}_2\text{SO}_4$  (a) and 3 M  $\text{H}_2\text{SO}_4$  + 0.2 M KI electrolytes (b). GCD curves of the  $\text{Ti}_3\text{C}_2\text{T}_x$  film based SCs in 3 M  $\text{H}_2\text{SO}_4$  and 3 M  $\text{H}_2\text{SO}_4$  + 0.2 M KI electrolytes based on the total mass of the two electrodes at different current densities: (c) 1  $\text{A g}^{-1}$ , (d) 5  $\text{A g}^{-1}$  and (e) 50  $\text{A g}^{-1}$ .

Fig. S17

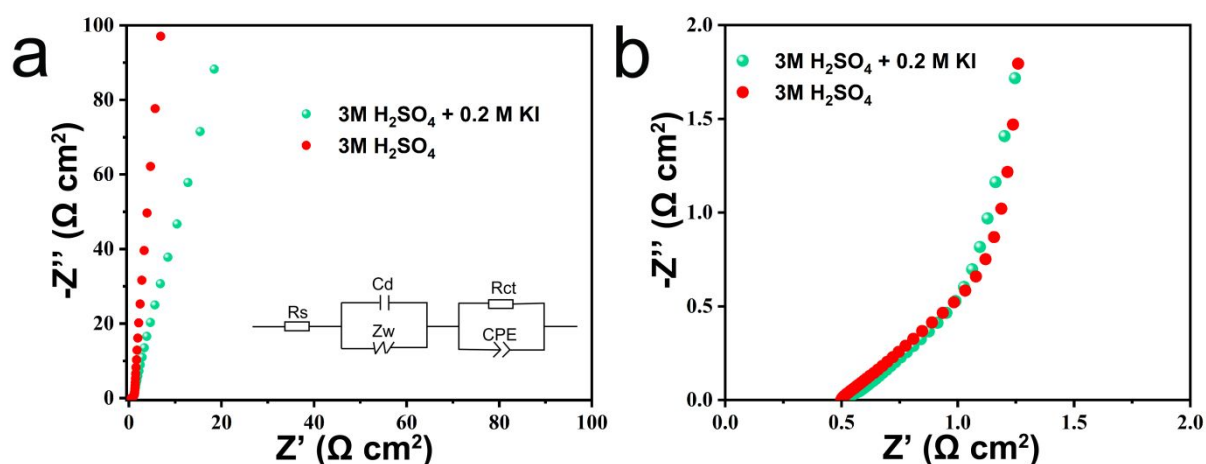

**Fig. S17.** (a) Nyquist plots of the  $\text{Ti}_3\text{C}_2\text{T}_x$  film based cells in 3 M  $\text{H}_2\text{SO}_4$  and 3 M  $\text{H}_2\text{SO}_4 + 0.2 \text{ M KI}$  electrolytes and its electrical equivalent circuit. (b) Magnified high-frequency region of the Nyquist plots.

The internal resistance ( $R_s$ ) is 0.50 and 0.52  $\Omega \text{ cm}^2$  for the cell in 3 M  $\text{H}_2\text{SO}_4$  and 3 M  $\text{H}_2\text{SO}_4 + 0.2 \text{ M KI}$  electrolytes, which prove that the introduction of KI almost has no effect on  $R_s$ . At the same time, the charge transfer resistance ( $R_{ct}$ ) is 1.0 and 1.6  $\Omega \text{ cm}^2$  for the cell in 3 M  $\text{H}_2\text{SO}_4$  and 3 M  $\text{H}_2\text{SO}_4 + 0.2 \text{ M KI}$  electrolytes, in which the higher  $R_{ct}$  is absorbed to the charge transfer progress of  $\text{I}^-/\text{I}_3^-$ .
